# Supplementary material
Source: PubMed Central journal article supplement (PMC6225525)
Supplement: NIHMS1506876-supplement-2.pdf [file NIHMS1506876-supplement-2.pdf]

Figure S1 Related to Figure 1.

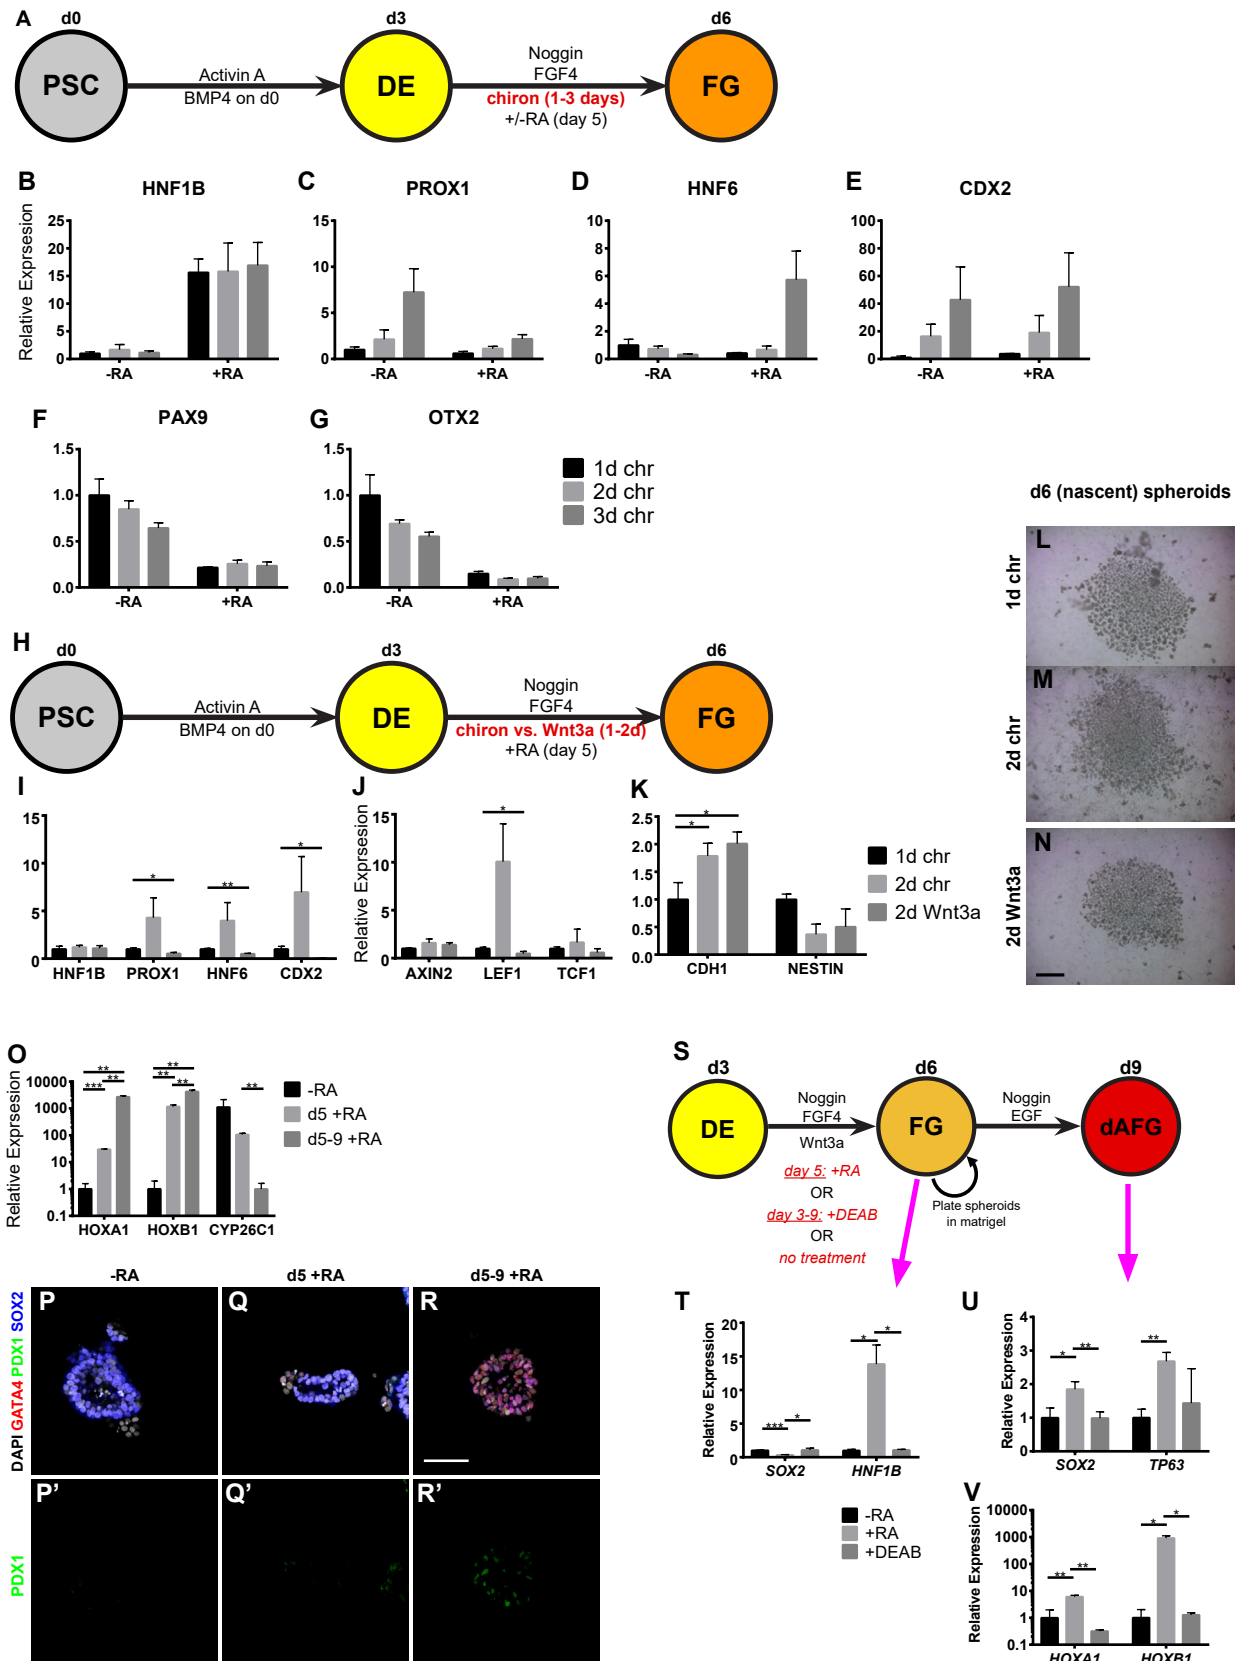

**Figure S1 Related to Figure 1:** Modulating the duration of Wnt and retinoic acid signaling to coordinate foregut patterning across the anterior-posterior axis.

**(A)** Schematic depicting the experimental protocol to pattern foregut spheroids along the anterior-posterior axis using CHIR99021 (chiron, or chr) and retinoic acid (RA). **(B-G)** qPCR analysis of day 6 spheroids resulting from varying the duration of chiron treatment with or without retinoic acid treatment for **(B)** the anterior and posterior foregut marker *HNFB*, **(C-D)** the posterior foregut markers *PROX1* and *HNFB*, **(E)** the hindgut marker *CDX2*, **(F-G)** and the pharyngeal markers *PAX9* and *OTX2*. **(H-N)** A comparison of chiron versus Wnt3a treatment on endoderm by qPCR analysis of **(H)** the foregut marker *SOX2*, **(I)** *HNFB*, *PROX1*, *HNFB*, and *CDX2*, **(J)** Wnt target genes *AXIN2*, *LEF1*, and *TCF1*, and **(K)** epithelial and neural marker *CDH1* and *NESTIN*, respectively. Spheroids generated with one day of chiron treatment have same gene expression profile as those generated with 2 days of Wnt3a. **(L-N)** Brightfield imaging of nascent spheroids resulting from chiron versus Wnt3a treatments show that the efficiency of generating spheroids is unaffected in the different conditions. **(O-R)** Analysis of day 9 spheroids resulting from altering the duration of retinoic acid treatment starting on day 5. qPCR analysis of **(O)** retinoic acid targets *HOXA1*, *HOXB1*, *CYP26C1*. **(S)** Schematic depicting experimental protocol for modulating retinoic acid signaling using the synthesis inhibitor DEAB. **(T-U)** qPCR analysis of **(T)** foregut markers at day 6, **(U)** dorsal anterior foregut markers *SOX2* and *TP63* ( $\Delta N$  isoform) at day 9, and **(V)** RA targets *HOXA1* and *HOXB1* at day 9. Scale bar = 500  $\mu\text{m}$  in **(L-N)** and 50  $\mu\text{m}$  in **(P-R)**. Error bars indicate SD. \* $p \leq 0.05$ , \*\* $p \leq 0.01$ , and \*\*\* $p \leq 0.001$  for two-tailed t-test.

Figure S2 Related to Figure 1.

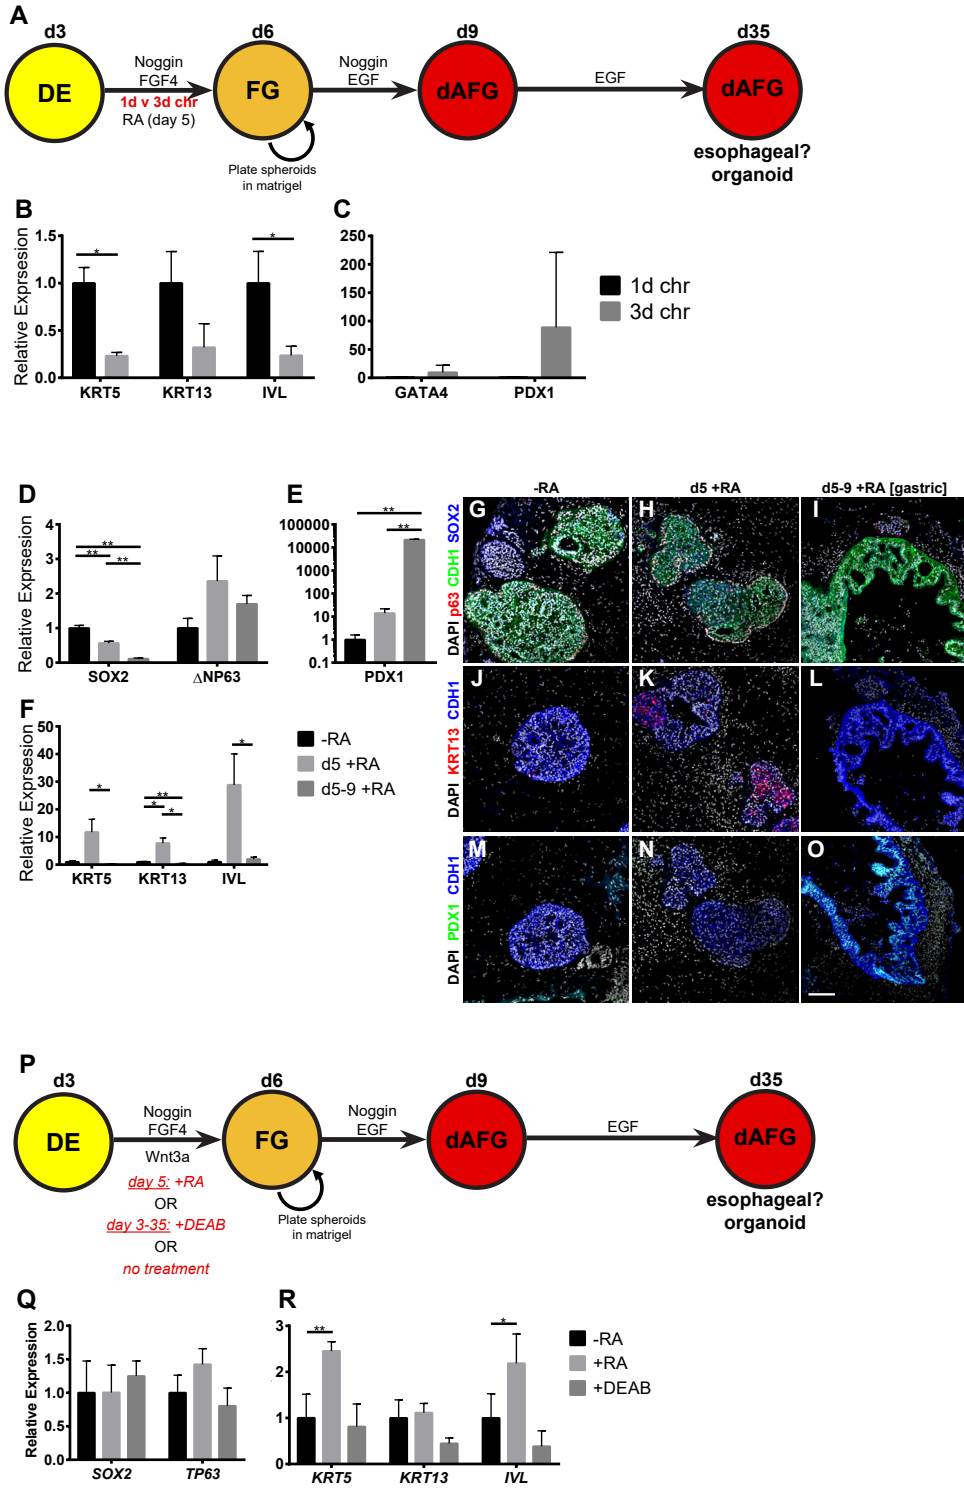

**Figure S2 Related to Figure 1:** Early modulation of Wnt and retinoic acid signaling affects later differentiation into human esophageal organoids.

(A) Schematic depicting the experimental protocol to generate organoids starting with foregut spheroids treated with chiron for 1 or 3 days. (B-C) qPCR analysis of day 35 (1 month old) organoids for (B) stratified squamous epithelial markers *KRT5*, *KRT13*, and *KRT13*, and (C) posterior foregut markers *GATA4* and *PDX1*. (D-O) Analysis of day 35 (1 month old) organoids resulting from altering the duration of retinoic acid treatment starting on day 5. qPCR analysis of (D) anterior foregut basal transcription factors *SOX2* and  $\Delta$ N isoform of *TP63*, (E) antral stomach and pancreas marker *PDX1*, and (F) stratified squamous epithelial markers *KRT5*, *KRT13*, and *IVL*. Immunofluorescence analysis of one month old organoids with (G-I) SOX2 and p63, (J-L) KRT13, and (M-O) PDX1. (P) Schematic depicting experimental protocol for modulating retinoic acid signaling using the synthesis inhibitor DEAB. (Q-R) qPCR analysis of day 35 organoids of (Q) esophageal basal markers *SOX2* and *TP63*, (R) stratified squamous epithelial markers *KRT5*, *KRT13*, and *IVL*. These data is representative of 2 separate experiments with n=3 wells in each experiment. Scale bar = 100  $\mu$ m. Error bars indicate SD. \*p  $\leq$  0.05 and \*\*p  $\leq$  0.01 for two-tailed t-test.

Figure S3 Related to Figure 2.

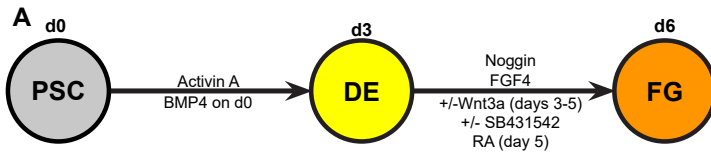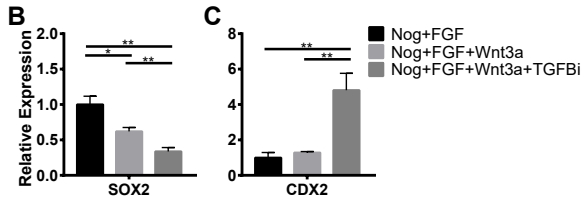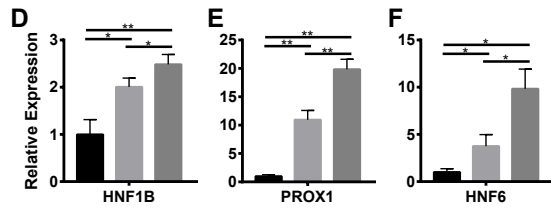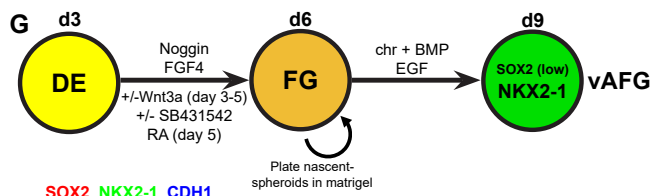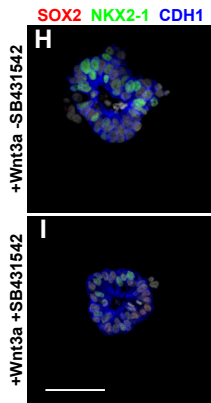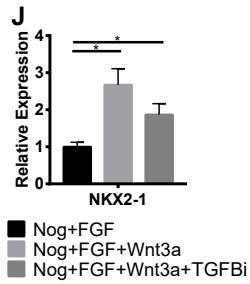

**Figure S3 Related to Figure 2:** TGF $\beta$  inhibition is not required to pattern foregut into anterior foregut spheroids in these culture conditions.

**(A)** Schematic depicting the experimental protocol to test the requirement of TGF $\beta$  signaling in anterior-posterior patterning of the foregut. **(B-F)** qPCR analysis on day 6 anterior foregut spheroids treated with and without Wnt3a and TGF $\beta$  inhibitor (SB431542, 10  $\mu$ M) treatment for **(B-C)** foregut marker *SOX2* and hindgut marker *CDX2*, **(D)** foregut marker *HNF1B*, and **(E-F)** posterior foregut markers *PROX1* and *HNF6*. **(G)** Schematic depicting the experimental protocol to test the competency of anterior foregut spheroids treated with and without Wnt3a or the TGF $\beta$  inhibitor SB431542 to respond to respiratory induction. **(H-J)** Analysis of day 9 spheroids for NKX2-1 by **(H-I)** immunofluorescence and **(J)** qPCR. Scale bar = 50  $\mu$ m. Error bars indicate SD. \* $p \leq 0.05$  and \*\* $p \leq 0.01$  for two-tailed t-test.

Figure S4 Related to Figure 3.

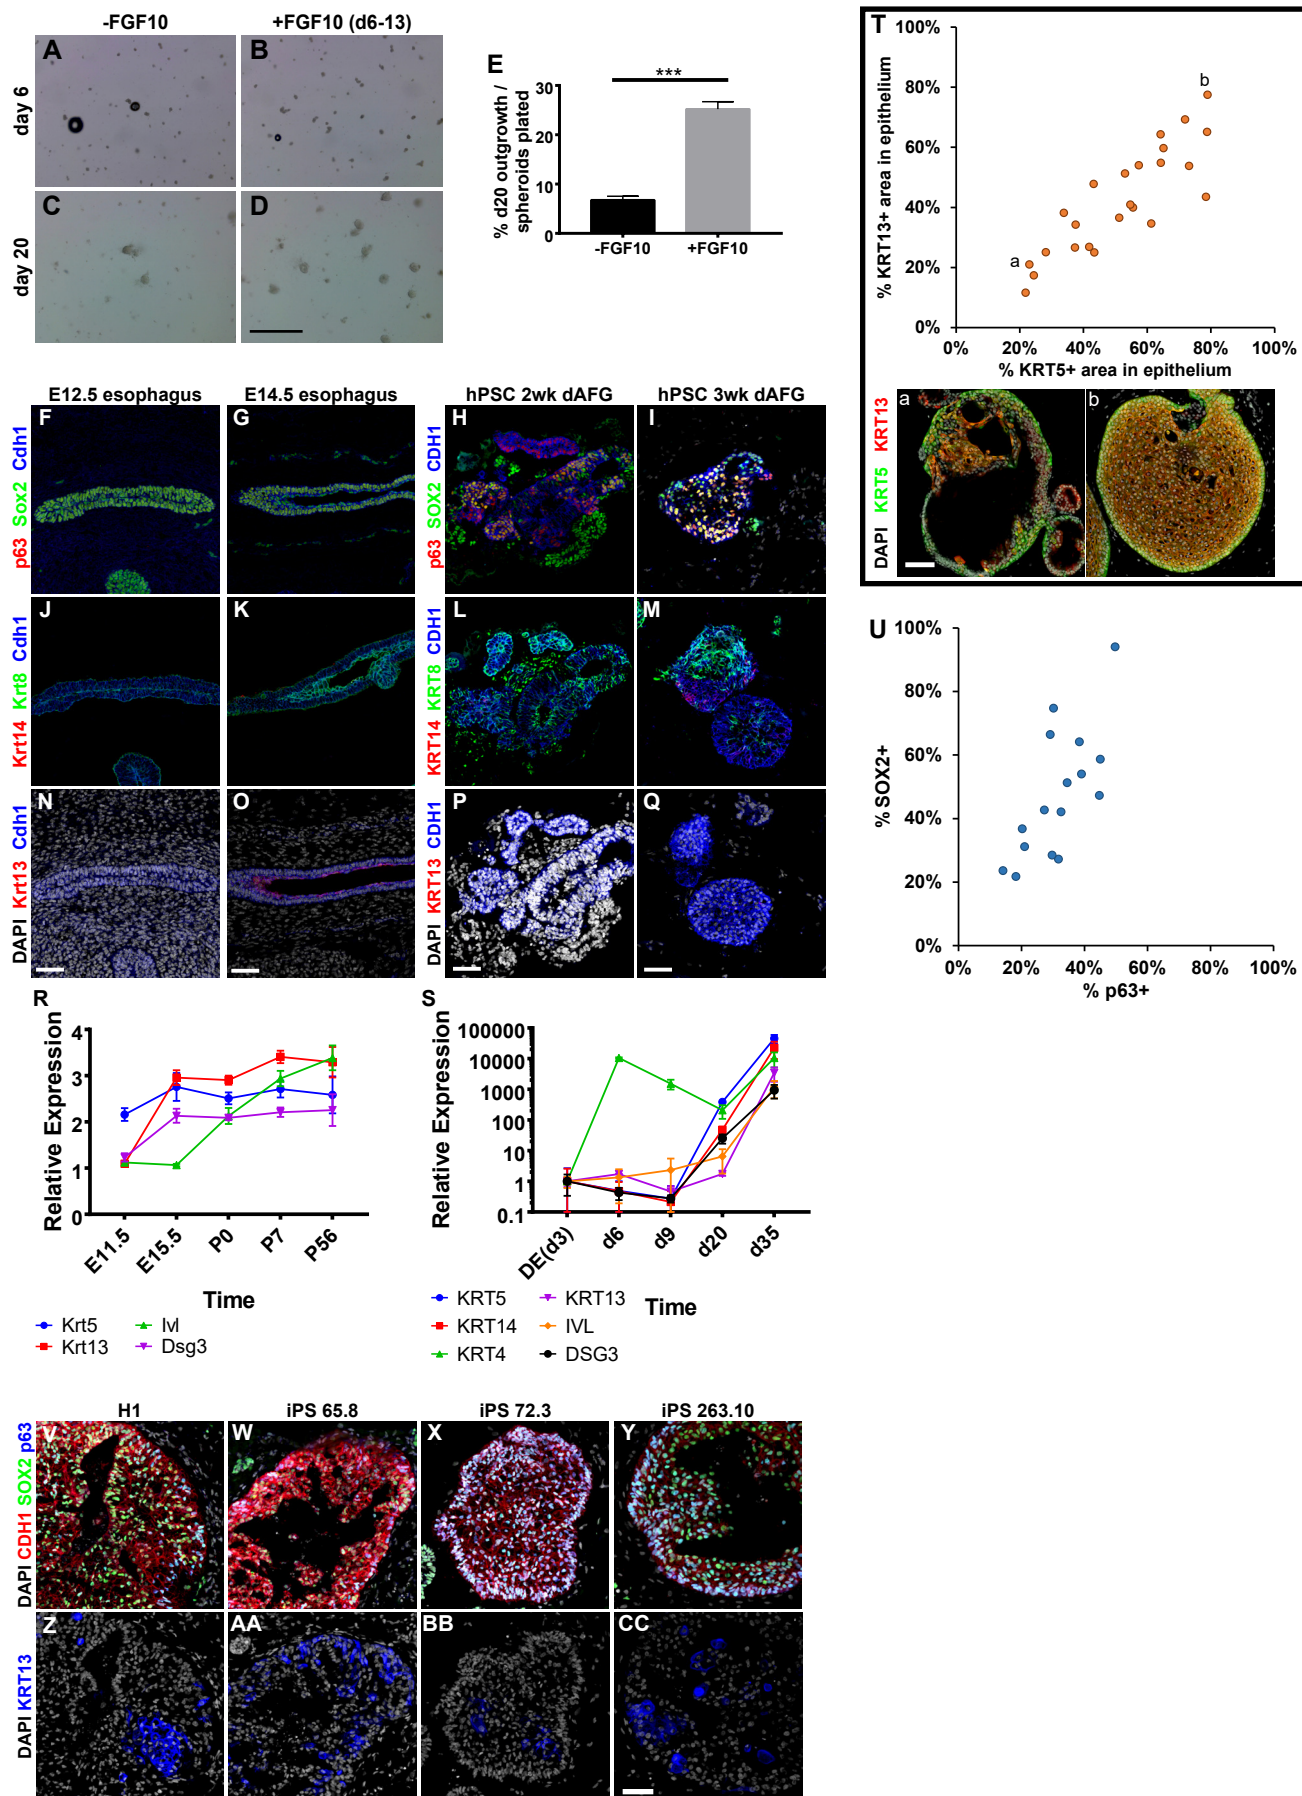

**Figure S4 Related to Figure 3:** Robust outgrowth of human esophageal organoids and a comparison to mouse embryonic esophageal development.

(A-E) Improved spheroid outgrowth efficiency of organoids treated with FGF10 from day 6-13 as analyzed by (A-D) brightfield imaging and (E) quantification of the images. (F-Q) Comparative analysis by immunofluorescence staining of mouse embryonic esophagi at E12.5 (F,J,N) and E14.5 (G,K,O) and human esophageal organoids (HEOs) at 2 weeks (H,L,P) and 3 weeks (I,M,Q). (R) Gene expression of stratified squamous epithelial markers in mouse esophagi across time; public data acquired from GEO dataset GSE34728 (Chen et al. 2012). (S) qPCR analysis of various time points during differentiation of definitive endoderm to human esophageal organoids for stratified squamous epithelial markers. (T) Quantification of day 62 HEOs for % area of epithelia positive for KRT5 and KRT13. Each point is an individual organoid, and subpanels “a” and “b” are representative images of different organoids depicted in this graph. (U) Quantification of day 62 HEOs for % epithelial nuclei positive for SOX2 and p63. Each point is an individual organoid. (V-CC) Immunofluorescence analysis of 1-month old HEOs across different cell lines tested, examining esophageal enriched markers SOX2 and p63 (V-Y), and KRT13 (Z-CC). Scale bar = 500  $\mu\text{m}$  in (A-D), 50  $\mu\text{m}$  in (F-Q, V-CC), and 100  $\mu\text{m}$  in (T-U). Error bars indicate SD. \* $p \leq 0.05$ , \*\* $p \leq 0.01$ , and \*\*\* $p \leq 0.001$  for two-tailed t-test.



Figure S5 Related to Figure 4.

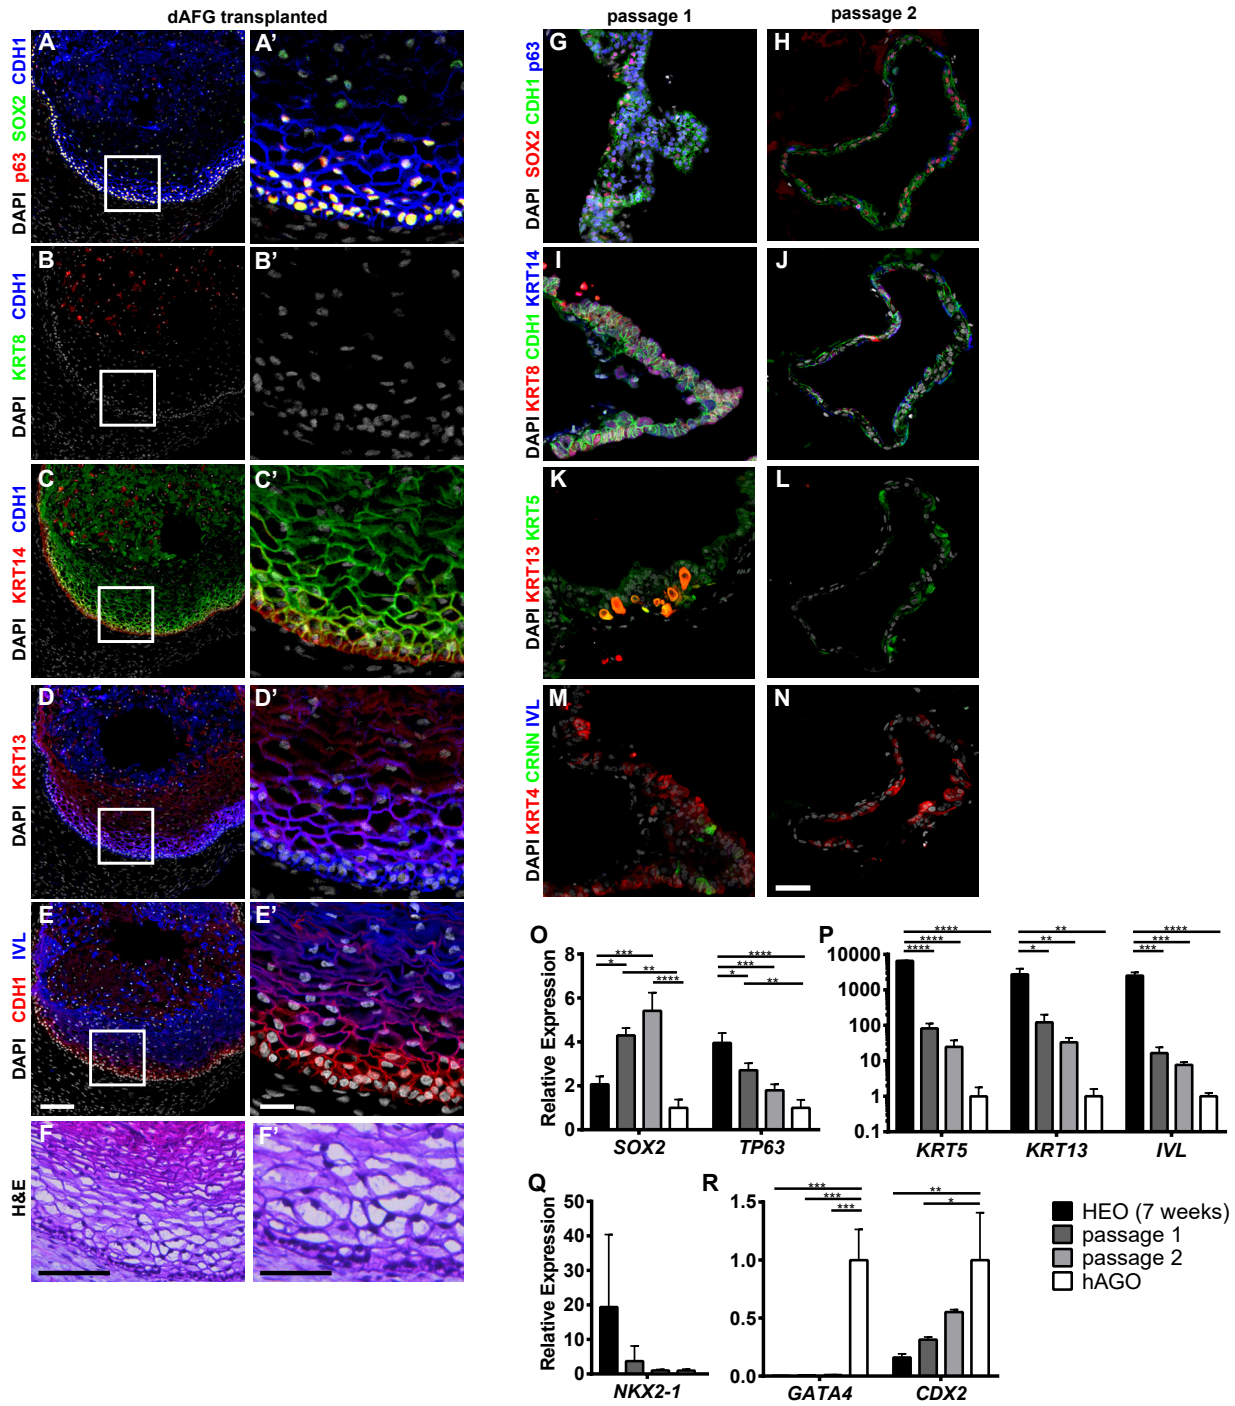

**Figure S5 Related to Figure 4:** Alternate methods of human esophageal organoid maturation and expansion. **(A-F)** Analysis of HEOs grown for 2 months after transplantation into immunodeficient mice's kidney capsules by **(A-E)** Immunofluorescence images for early (KRT8) and differentiated (KRT13, KRT14, and IVL) esophageal specific markers, and **(F)** H&E. **(G-R)** Analysis of HEOs mechanically passaged (dissociated and re-cultured) twice. **(G-N)** IF images of passaged organoids for **(G-H)** transcription factors SOX2 and p63, **(I-J)** immature (KRT8) and basal marker (KRT14), **(K-L)** basal (KRT5) and suprabasal (KRT13) markers, and **(M-N)** suprabasal differentiated markers KRT4, CRNN, and IVL. **(O-R)** qPCR analysis comparing passaged HEOs to normal HEOs and gastric organoids (hAGO) for **(O)** transcription markers *SOX2* and *TP63*, **(P)** stratified squamous markers *KRT5*, *KRT13*, *IVL*, and **(Q-R)** patterning markers for lung (*NKX2-1*), stomach (*GATA4*), and intestine (*GATA4* and *CDX2*). \* $p \leq 0.05$ , \*\* $p \leq 0.01$ , and \*\*\* $p \leq 0.001$  for two-tailed t-test.



**Figure S6 Related to Figure 5:** Post-gastrulation endodermal or broad Sox2 knockout results in a similar phenotype of esophageal agenesis.

**(A-B)** Wholemount immunofluorescence (IF) analysis for dorsal marker Sox2 (red), respiratory marker Nkx2-1 (green) in E9.5 control (*Sox2<sup>fl/fl</sup>*) and Sox2-DE-LOF (*FoxA2<sup>CreER</sup>;Sox2<sup>fl/fl</sup>*) embryos. **(C-D)** Wholemount IF analysis for Sox2, Nkx2-1 in E10.5 control (*Sox2<sup>fl/fl</sup>*) and Sox2-DE-LOF (*FoxA2<sup>CreER</sup>;Sox2<sup>fl/fl</sup>*) embryos. White arrowheads highlight normal versus ectopic Nkx2-1 expression. **(E-F)** IF analysis of foregut sections of E11.5 embryos for the apical marker aPKC (green). **(G-H)** Wholemount IF analysis for Nkx2-1 of E11.5 control (*Sox2<sup>fl/+</sup>*) and Sox2-cKO (*Sox2<sup>CreER/fl</sup>*) embryos taken from dams gavaged at 8.5dpc. **(I-L)** Immunofluorescence analysis of E11.5 embryos (similar as in E-F) for **(I-J)** Sox2 and Nkx2-1, and **(K-L)** Sox2 and p63. **(M-T)** IF analysis of E10.5 control (*Sox2<sup>fl/+</sup>*) and Sox2-cKO (*Sox2<sup>CreER/fl</sup>*) embryos taken from dams gavaged at 8.5dpc for epithelial morphology across the anterior **(M,N)** to posterior **(S,T)** axis. **(S,T)** Quantification of **(U)** cleaved Caspase 3 and **(V)** Ki67 IF staining in E10.5 mouse embryonic foregut for cell death at the point of segregation of the dorsal and ventral foreguts in control (Cre-, *Sox2<sup>fl/+</sup>*) and Sox2 cKO (Cre+, *Sox2<sup>CreER/fl</sup>*) embryos taken from dams gavaged at 8.5dpc. Scale bar = 100  $\mu$ m for **(A-D, G-H)**, 50  $\mu$ m for **(I-T)**, and 25  $\mu$ m for **(E-F)**. For Sox2-DE-LOF embryos, n=3 embryos of each genotype at E9.5, and n=2 embryos for each analysis for each genotype at E11.5 (a minimum of 2 litters were harvested for each analysis and time point). For Sox2-driven Sox2 cKO embryos, n=3 embryos for each genotype. Error bars indicate SD. \*p  $\leq$  0.05 for two-tailed t-test. fg = foregut, dfg = dorsal foregut, vfg = ventral foregut, ph = pharyngeal endoderm, eso = esophagus, r = respiratory progenitor, thy = thyroid, tr = trachea, br = bronchi, st = stomach.

Figure S7 Related to Figure 7.

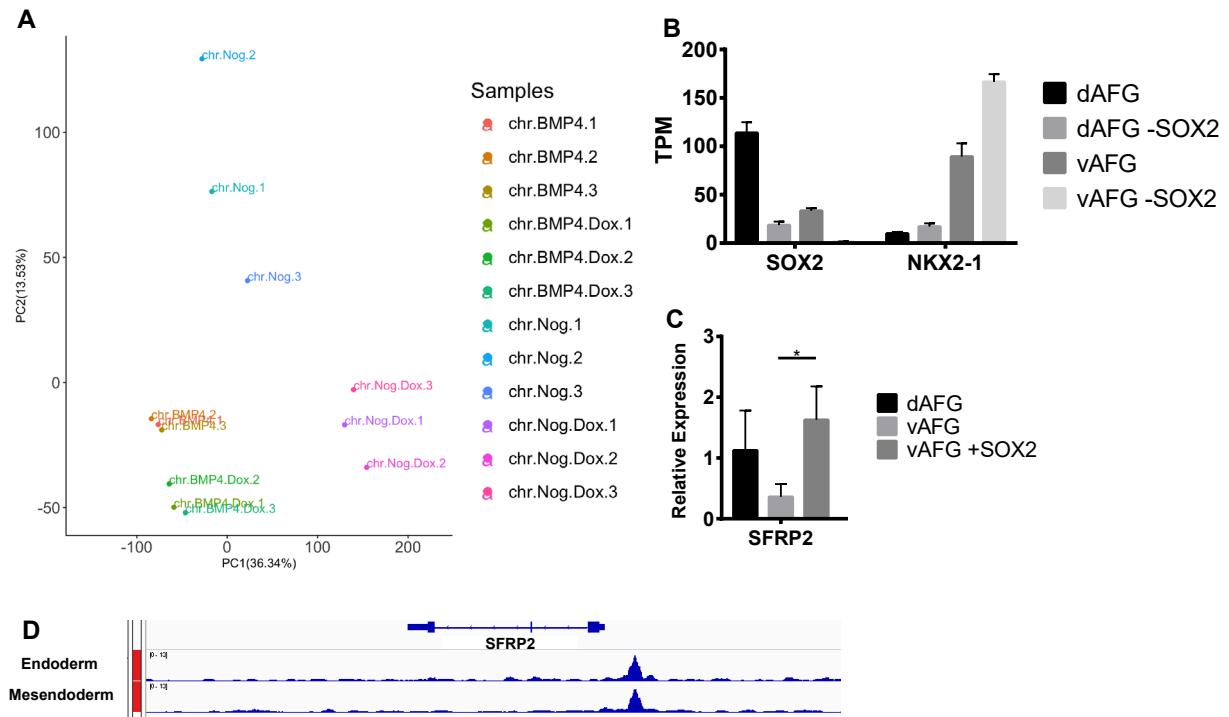

**Figure S7 Related to Figure 7:** Analysis of loss or gain of function on Sox2 in human cultures.

**(A)** Principal component analysis of the transcriptome resulting from day 9 anterior foregut cultures patterned along the dorsal-ventral axis with and without SOX2 (without or with Dox treatment to activate the CRISPR interference construct). Dorsal vs. ventral anterior foregut (dAFG vs. vAFG) is indicated as chr+Nog and chr+BMP4, respectively. Knockdown is indicated by the +Dox. **(B)** TPM values for *SOX2* and *NKX2-1*. **(C)** qPCR analysis for *SFRP2* on day 9 anterior foregut cultures patterned along the dorsal (dAFG) and ventral (vAFG) axis, including inducing exogenous HA-tagged SOX2 in ventral cultures by Dox treatment on day 8. **(D)** Genome browser view of Sox2 peaks at the *SFRP2* locus in hPSC-derived endoderm (GSM1505764) and mesendoderm (GSM1505767) from GEO dataset GSE61475 (Tsankov et al., 2015). Scale bar = 500  $\mu$ m. Error bars indicate SD. \* $p \leq 0.05$  for two-tailed t-test.

**Table S1: List of primers used for qPCR analysis. Related to Figures 1-7.**

| Gene                         | Species | Strand  | Sequence                       |
|------------------------------|---------|---------|--------------------------------|
| <i>DSG3</i>                  | human   | forward | CGT GGT TGT CTC CGC TAG AA     |
|                              | human   | reverse | CCG AGG TAG CAT TGA GGG TT     |
| <i>KRT5</i>                  | human   | forward | CTG GTC CAA CTC CTT CTC CA     |
|                              | human   | reverse | GGA GCT CAT GAA CAC CAA GC     |
| <i>FOXE1</i>                 | human   | forward | CGA CAA CCC CAA AAA GTG GC     |
|                              | human   | reverse | GCC CAG TAG TTG CCC TTA CC     |
| <i>TBX1</i>                  | human   | forward | GTC TAT GTG GAC CCA CGC AA     |
|                              | human   | reverse | CTG CGT GAT CCG ATG GTT CT     |
| <i>SFRP2</i>                 | human   | forward | CCA CCG AGG AAG CTC CAA A      |
|                              | human   | reverse | TTC AGG TCC CTT TCG GAC AC     |
| <i>SOX2</i>                  | human   | forward | GCT TAG CCT CGT CGA TGA AC     |
|                              | human   | reverse | AAC CCC AAG ATG CAC AAC TC     |
| <i>PAX9</i>                  | human   | forward | GGT AGG GTA AGG AGC CAT GC     |
|                              | human   | reverse | CTG GAG CAG GAA GCC AAG TA     |
| <i>GATA4</i>                 | human   | forward | TAG CCC CAC AGT TGA CAC AC     |
|                              | human   | reverse | GTC CTG CAC AGC CTG CC         |
| <i>KRT13</i>                 | human   | forward | AGG TGA AGA TCC GTG ACT GG     |
|                              | human   | reverse | GTT GTT TTC AAT GGT GGC G      |
| <i>KRT14</i>                 | human   | forward | GGC CTG CTG AGA TCA AAG AC     |
|                              | human   | reverse | TCT GCA GAA GGA CAT TGG C      |
| <i>IVL</i>                   | human   | forward | CTG CCT CAG CCT TAC TGT GA     |
|                              | human   | reverse | GGA GGA GGA ACA GTC TTG AGG    |
| <i>LEF1</i>                  | human   | forward | CAC TGT AAG TGA TGA GGG GG     |
|                              | human   | reverse | TGG ATC TCT TTC TCC ACC CA     |
| <i>TCF1</i>                  | human   | forward | GAC TTG ACC ATC TTC GCC AC     |
|                              | human   | reverse | CCT CAA AGA GCT GGA GAA CCT    |
| <i>HNF1B</i>                 | human   | forward | TCA CAG ATA CCA GCA GCA TCA GT |
|                              | human   | reverse | GGG CAT CAC CAG GCT TGT A      |
| <i>PROX1</i>                 | human   | forward | GGC ATT GAA AAA CTC CCG TA     |
|                              | human   | reverse | ACA GGG CTC TGA ACA TGC AC     |
| <i>HNF6</i>                  | human   | forward | TGT TGC CTC TAT CCT TCC CA     |
|                              | human   | reverse | GGA GGA TGT GGA AGT GGC T      |
| <i>PDX1</i>                  | human   | forward | CGT CCG CTT GTT CTC CTC        |
|                              | human   | reverse | CCT TTC CCA TGG ATG AAG TC     |
| <i>(ΔN isoform)<br/>TP63</i> | human   | forward | AGC CAG AAG AAA GGA CAG CA     |
|                              | human   | reverse | TCG TGT ACT GTG GCT CAC TAA    |
| <i>RFX6</i>                  | human   | forward | CCA GTT TTT GAG CTA AGC GAA    |
|                              | human   | reverse | TGG CAT CAA AGA GAG CAG TG     |
| <i>MNX1</i>                  | human   | forward | CTG CCT AAG ATG CCC GAC T      |
|                              | human   | reverse | AGC TGC TGG CTG GTG AAG        |
| <i>NKX2-1 (TTF1)</i>         | human   | forward | CTC ATG TTC ATG CCG CTC        |
|                              | human   | reverse | GAC ACC ATG AGG AAC AGC G      |
|                              |         |         |                                |

|                     |       |         |                                 |
|---------------------|-------|---------|---------------------------------|
| <i>CDH1 (E-CAD)</i> | human | forward | GAC CGG TGC AAT CTT CAA A       |
|                     | human | reverse | TTG ACG CCG AGA GCT ACA C       |
| <i>AXIN2</i>        | human | forward | CTG GTG CAA AGA CAT AGC CA      |
|                     | human | reverse | AGT GTG AGG TCC ACG GAA AC      |
| <i>KRT4</i>         | human | forward | CCT GAG ATC CAG AAA GTC CG      |
|                     | human | reverse | TTC CAT TTG GTC TCC AGG AC      |
| <i>CDX2</i>         | human | forward | CTG GAG CTG GAG AAG GAG TTT C   |
|                     | human | reverse | ATT TTA ACC TGC CTC TCA GAG AGC |
| <i>NESTIN</i>       | human | forward | GAG GGA AGT CTT GGA GCC AC      |
|                     | human | reverse | AAG ATG TCC CTC AGC CTG G       |
| <i>HOXA1</i>        | human | forward | GTA CGG CTA CCT GGG TCA AC      |
|                     | human | reverse | ACT TGG GTC TCG TTG AGC TG      |
| <i>HOXB1</i>        | human | forward | AAC CCA CCC AAG ACA GCG AA      |
|                     | human | reverse | CGC GCT TCT TCT GCT TCA TTC     |
| <i>CYP26C1</i>      | human | forward | GTT CCC TTC AGT GGC CTA CG      |
|                     | human | reverse | ACA GCC GAC TCC TTC AGC TC      |
| <i>OTX2</i>         | human | forward | GGA AGC ACT GTT TGC CAA GAC C   |
|                     | human | reverse | CTG TTG TTG GCG GCA CTT AGC T   |
| <i>CRNN</i>         | human | forward | TGT GAT TGT GAA ACC CCA CGA     |
|                     | human | reverse | GCA CTC TCG CTC AGT GTC TT      |
| <i>TMPRSS11A</i>    | human | forward | GTC TCC TGG TTC ACT TCC TAG T   |
|                     | human | reverse | GTG TTG CTT TGT CCG AAA TTG T   |
| <i>TMPRSS11D</i>    | human | forward | GCA GTC ACC ATA GCT CTA CTT G   |
|                     | human | reverse | CCA CTC AAA GTC CTG TAT TCC TG  |
| <i>CPHA (PPIA)</i>  | human | forward | CCC ACC GTG TTC TTC GAC ATT     |
|                     | human | reverse | GGA CCC GTA TGC TTT AGG ATG A   |



**Table S2: List of antibodies used for immunofluorescence staining. Related to Figures 1-7.**

| Antibody                           | Company                             | Catalog Number      | RRID Number     | Dilution |
|------------------------------------|-------------------------------------|---------------------|-----------------|----------|
| Goat anti-Sox2                     | Santa Cruz Biotechnology            | #sc-17320 (Y-17)    | RRID:AB_2286684 | 1:250    |
| rabbit anti-Sox2                   | Abcam                               | #ab97959            | RRID:AB_2341193 | 1:1000   |
| rabbit anti-p63                    | Santa Cruz Biotechnology            | #sc-8343            | RRID:AB_653763  | 1:200    |
| mouse anti-HNF1b                   | BD Transduction Laboratories        | #612504             | RRID:AB_399805  | 1:500    |
| rat anti-E-cadherin                | R&D Systems                         | #MAB7481            | RRID:AB_2076679 | 1:1000   |
| goat anti-E-cadherin               | R&D Systems                         | #AF648              | RRID:AB_355504  | 1:1000   |
| mouse anti-E-cadherin              | BD Transduction Laboratories        | #610182             | RRID:AB_397581  | 1:500    |
| rabbit anti-Nkx2.1                 | Abcam                               | #ab76013            | RRID:AB_1310784 | 1:1000   |
| rat anti-Krt8                      | DSHB                                | #TROMA-I-S          | RRID:AB_531826  | 1:100    |
| mouse anti-Krt4                    | Abcam                               | #ab9004             | RRID:AB_306932  | 1:200    |
| rabbit anti-Krt13                  | Abcam                               | #ab92551            | RRID:AB_2134681 | 1:1000   |
| rabbit anti-Krt14                  | BioLegend                           | #905301 (PRB-155P)  | RRID:AB_2565048 | 1:2000   |
| rabbit anti-Ki67                   | Cell Marque                         | #275R-15 (SP6)      | RRID:AB_1158037 | 1:100    |
| rabbit anti-Iv1                    | Atlas Antibodies                    | #HPA055211          | RRID:AB_2682739 | 1:250    |
| rabbit anti-Dsg3                   | Cell Marque                         | #436R-15            |                 | 1:200    |
| goat anti-FoxA2                    | Santa Cruz Biotechnology            | #sc-6554            | RRID:AB_2262810 | 1:500    |
| rat anti-HA-Biotin                 | Sigma-Aldrich (Roche)               | #12158167001 (3F10) | RRID:AB_390915  | 1:300    |
| goat anti-Pdx1                     | Abcam                               | #ab47383            | RRID:AB_2162359 | 1:5000   |
| goat anti-Gata4                    | Santa Cruz Biotechnology            | #sc-1237            | RRID:AB_2108747 | 1:200    |
| rabbit anti-Caspase 3 (cleaved)    | Cell Signaling                      | #9661               | RRID:AB_2341188 | 1:200    |
| rabbit anti-Cdx2                   | Cell Marque                         | #235R-15 (EPR2764Y) | RRID:AB_1516799 | 1:200    |
| mouse anti-Cdx2                    | BioGenex                            | #cdx2-88            | RRID:AB_2650531 | 1:300    |
| rabbit anti-B-catenin              | Santa Cruz                          | #sc-7199            | RRID:AB_634603  | 1:100    |
| mouse anti-Filaggrin               | Santa Cruz                          | #sc-66192           | RRID:AB_1122916 | 1:200    |
| goat anti-Cornulin                 | R&D Systems                         | #AF3607             | RRID:AB_2085498 | 1:200    |
| anti-DIG alkaline phosphatase      | Sigma-Aldrich                       | #11093274910        | RRID:AB_514497  | 1:5000   |
| AlexaFluor Donkey anti-goat 488    | Thermo Fisher Scientific            | #A11055             | RRID:AB_2534102 | 1:500    |
| AlexaFluor Donkey anti-goat 568    | Thermo Fisher Scientific            | #A11057             | RRID:AB_2534104 | 1:500    |
| AffiniPure Donkey anti-mouse 647   | Jackson ImmunoResearch laboratories | #715-605-150        | RRID:AB_2340862 | 1:500    |
| AlexaFluor Donkey anti-mouse 568   | Thermo Fisher Scientific            | #A10037             | RRID:AB_2534013 | 1:500    |
| AlexaFluor Donkey anti-rabbit 647  | Thermo Fisher Scientific            | #A31573             | RRID:AB_2536183 | 1:500    |
| AlexaFluor Donkey anti-rabbit 546  | Thermo Fisher Scientific            | #A10040             | RRID:AB_2534016 | 1:500    |
| AffiniPure Donkey Anti-Rat 647 IgG | Jackson ImmunoResearch laboratories | #712-605-153        | RRID:AB_2340694 | 1:500    |
